# Computational and experimental insights into the chemosensory navigation of *Aedes aegypti* mosquito larvae

Eleanor K. Lutz<sup>a</sup>, Tjinder S. Grewal<sup>b</sup>, Jeffrey A. Riffell<sup>a</sup>

<sup>a</sup>Department of Biology, University of Washington, Box 351800, Seattle, WA 98195, USA

<sup>b</sup>Department of Biochemistry, University of Washington, Box 357350, Seattle, WA 98195, USA

---

## Abstract

Mosquitoes are prolific disease vectors that affect public health around the world. Although many studies have investigated search strategies used by host-seeking adult mosquitoes, little is known about larval search behavior. Larval behavior affects adult body size and fecundity, and thus the capacity of individual mosquitoes to find hosts and transmit disease. Understanding vector survival at all life stages is crucial for improving disease control. In this study we use experimental and computational methods to investigate the chemical ecology and search behavior of *Aedes aegypti* mosquito larvae. We show that larvae do not respond to several olfactory cues used by adult *Ae. aegypti* to assess larval habitat quality, but perceive microbial RNA as a potent foraging attractant. Second, we demonstrate that *Ae. aegypti* larvae use a strategy consistent with chemokinesis, rather than chemotaxis, to navigate chemical gradients. Using computational modeling, we further show that chemokinesis is more efficient than chemotaxis for avoiding repellents in ecologically relevant larval habitat sizes. Finally, we use experimental observations and computational analyses to demonstrate that larvae respond to starvation pressure by optimizing exploration behavior. Our results identify key characteristics of foraging behavior in a disease vector mosquito, including the identification of a surprising foraging attractant and an unusual behavioral mechanism for chemosensory preference. In addition to implications for better understanding and control of disease vectors, this work establishes mosquito larvae as a tractable model for chemosensory behavior and navigation.

**Keywords:** Mosquito, Behavior, *Aedes aegypti*, Larvae, Chemotaxis, Chemosensation

---

## 1 Introduction

2 The mosquito *Aedes aegypti* is a global vector of dis-  
3 eases such as Dengue, Zika, and Chikungunya [1]. This  
4 synanthropic mosquito is evolutionarily adapted to hu-  
5 man dwellings, with some populations breeding ex-  
6 clusively indoors [2, 3]. The urban microhabitat is a  
7 fascinating environment with unique climatic regimes,  
8 photoperiod, and resource availability. In response to  
9 these selective pressures, successful synanthropic ani-  
10 mals including cockroaches [4], rats [5], and crows [6]  
11 exhibit many behaviors absent in non-urbanized sib-  
12 ling species. Understanding these behaviors is of ma-  
13 jor importance to public health. Throughout human  
14 history, synanthropic disease vectors have caused dev-  
15 astating pandemics like the Black Death, which killed  
16 an estimated 30-40% of the Western European popula-  
17 tion [7, 8]. Like rats or cockroaches, adult *Ae. aegypti*  
18 mosquitoes exhibit many behavioral adaptations to  
19 human microhabitats [2, 9]. However, comparatively  
20 little is known about larval adaptations. The larval  
21 environment directly affects adult body size [10, 11],  
22 fecundity [11], and biting persistence [12], and under-

23 standing vector survival at all life stages is crucial for  
24 improving disease control [13]. Despite growing inter-  
25 est [14, 15, 16], it remains an open question of how  
26 environmental stimuli affect larval behavior to regu-  
27 late these responses and processes.

28 In addition to the above public health implications,  
29 the behavior of synanthropic mosquito larvae is fasci-  
30 nating from a theoretical search strategy perspective.  
31 *Ae. aegypti* larvae are aquatic detritivores that live in  
32 constrained environments such as vases and tin cans  
33 [10]. In such limited environments, do larva exhibit a  
34 chemotactic search strategy (in which animals change  
35 their direction of motion in response to a chemical  
36 stimuli), or do they use a chemokinetic response (in  
37 which animals change a non-directional component of  
38 motion, such as speed or turn frequency, in response to  
39 a chemical stimuli) [17], or a purely stochastic behav-  
40 ior, akin to a random walk? Mechanistic understand-  
41 ing of larval foraging behavior may provide insight into  
42 chemosensory systems controlling the behavior as well  
43 as the evolutionary adaptations for these systems in  
44 synanthropic environments.

45 In this work, we investigate larval *Ae. aegypti* be-  
46 havior from a chemical ecological and search theory  
47 perspective. First, we explore the chemosensory cues  
48 involved in larval foraging. Although many olfactory

---

Corresponding author –jriffell@uw.edu

Code: [github.com/eleanorlutz/aedes-aegypti-2019](https://github.com/eleanorlutz/aedes-aegypti-2019)

49 cues are used by adult females to select oviposition  
50 sites [18], it is unclear if larvae and adults use the same  
51 chemicals to assess larval habitat quality. Second, we  
52 consider larval search behavior in spatially restricted  
53 environments using empirical data and computational  
54 modeling. Our work identifies the functional loss of  
55 chemotaxis in foraging larvae - a fascinating example  
56 of how environmental restrictions can drive the evolu-  
57 tion of animal behavior. We further identify micro-  
58 bial RNA as a potent and unusual larval foraging at-  
59 tractant. Together, our results identify *Ae. aegypti* lar-  
60 vae as an exciting outlier in biological search theory,  
61 and highlights the importance of investigating synan-  
62 thropic disease vectors at all life history stages.

## 63 Results

### 64 *Effects of sex, physiological state, and circadian timing* 65 *on larval physiology*

66 Behavioral experiments in insects have demonstrated  
67 the importance of circadian timing, starvation, and age  
68 [19]. However, little is known about the effects of these  
69 variables on *Ae. aegypti* larvae. To better understand  
70 the baseline characteristics of our study organism, we  
71 used machine vision to track individual *Ae. aegypti*  
72 larvae in a custom arena (Fig 1A) and investigated the  
73 effects of nutritional state and sex on baseline larval  
74 behavior recorded before each experiment. For both  
75 fed and starved animals, female larvae were larger than  
76 males (fed larvae:  $n=120\text{♀}$ ,  $128\text{♂}$ ,  $p<0.0001$ ; starved  
77 larvae:  $n=79\text{♀}$ ,  $89\text{♂}$ ,  $p=0.008$ , Fig S1A). Starved lar-  
78 vae were also smaller than fed animals for both females  
79 ( $p<0.0001$ ) and males ( $p=0.015$ , Fig S1A). Because  
80 adult *Ae. aegypti* exhibit crepuscular activity [10], we  
81 also investigated the effects of circadian timing on lar-  
82 val behavior. We found no effects of circadian timing  
83 on larval movement speed, time spent moving, or time  
84 spent next to arena walls - supporting previous find-  
85 ings that mosquito larvae, unlike adults, exhibit little  
86 behavioral variation during the day [20, 21] ( $p=1$ ,  $p=1$ ,  
87  $p=1$ , Fig S1B-D).

### 88 *Quantifying the chemosensory environment in natural-* 89 *istic larval habitat sizes*

90 Previous research has shown that other species of  
91 mosquito larvae detect many different chemosensory  
92 stimuli [23]. In *Ae. aegypti* it is unclear what chemi-  
93 cal signals, if any, larvae use to navigate their environ-  
94 ment. Nevertheless, chemosensory cues may be essen-  
95 tial in avoiding predation or foraging efficiently. Us-  
96 ing our arena and machine vision methods, we investi-  
97 gated larval preference for six putatively attractive and  
98 aversive chemosensory cues. First, we experimentally  
99 verified the chemical diffusion in the arena and found  
100 that larval activity significantly influenced the distri-  
101 bution of stimuli within the arena ( $p<0.0001$ ). We

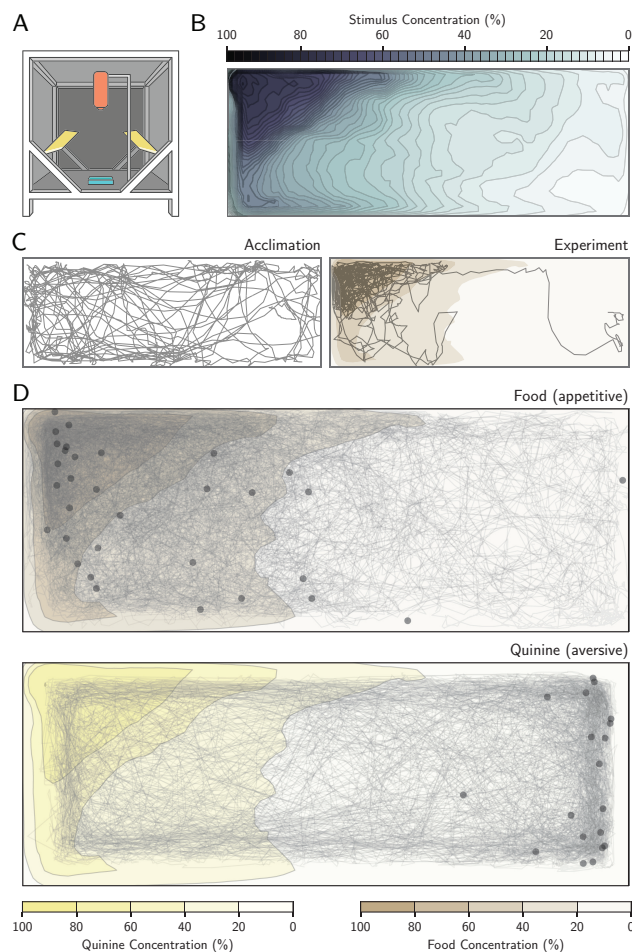

**Figure 1: Quantifying the chemosensory environment in naturalistic larval habitat sizes.** A: Diagram of experimental conditions, adapted from [22], including a Basler Scout Machine Vision GigE camera (orange), infrared lighting (yellow) and a behavior arena (blue). B: Chemosensory diffusion map of the behavior arena at the end of the 15 minute experiment. C: Example of an individual larval trajectory during the 15 minute acclimation phase (left). Trajectory of same individual during the 15 minute experiment phase, responding to food added to the left side of the arena (right). D: Trajectory of all starved animals presented with food (top) or quinine (bottom). Although trajectories are shown aggregated into one image, all animals were tested individually. Scatter points show the position of each animal at the end of the experiment.

102 next created a chemical diffusion map for analyzing  
103 stimuli preference using only experiments containing  
104 larvae (Fig 1B, Fig S2A-D). For chemosensory stimu-  
105 li, we used predicted attractive stimuli including a  
106 0.5% mixture of food (Hikari Tropic First Bites fish  
107 food) suspended in water, as well as food extract fil-  
108 tered through a  $0.2\mu\text{m}$  filter to remove solid particu-  
109 lates. Quinine was used as a putative aversive stimu-  
110 lus (a bitter tastant aversive to many insects including  
111 *Drosophila melanogaster* and *Apis mellifera* [24, 25]).  
112 We also tested indole and o-cresol, two microbial com-  
113 pounds that attract adult mosquitoes for oviposition  
114 [26]. Finally, we examined the larval response to mi-

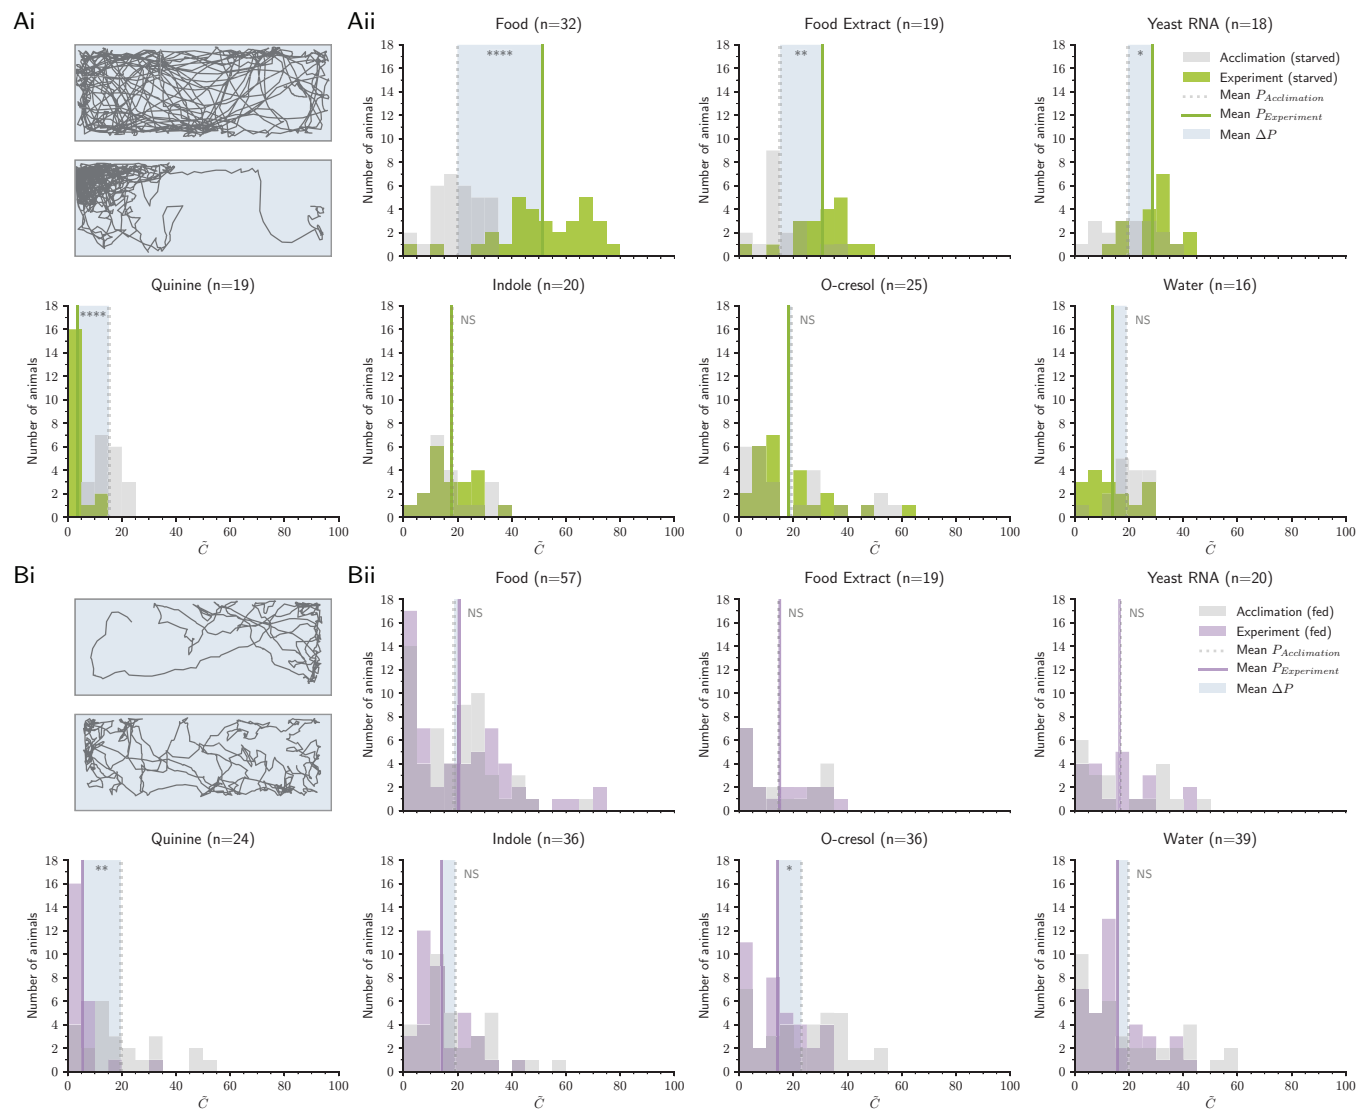

|                                           | Potential Chemosensory Search Strategies |            |              |              | Experiment Observations |
|-------------------------------------------|------------------------------------------|------------|--------------|--------------|-------------------------|
|                                           | Anosmic                                  | Chemotaxis | Klinokinesis | Chemokinesis |                         |
| Stimulus preference $\Delta P$            | no                                       | yes        | yes          | yes          | yes (p<0.0001)          |
| Directional preference $\Delta DP$        | no                                       | yes        | no           | no           | no (p=0.18)             |
| $\Delta$ Concentration speed $\Delta DS$  | no                                       | no         | no           | no           | no (p=1)                |
| Concentration speed $\Delta CS$           | no                                       | no         | no           | yes          | yes (p<0.0001)          |
| $\Delta$ Concentration turns $\Delta DTI$ | no                                       | yes        | no           | no           | no (p=1)                |
| Concentration turns $\Delta CTI$          | no                                       | no         | yes          | no           | no (p=1)                |

**Table 1: Comparing larval exploration behavior to canonical animal search strategy models.** Four different chemosensory search strategies are listed (central columns) along with the expected observable behavior metrics for each strategy (left column). By comparing the experimental observations (right column) with the expected results, we determined that *Ae. aegypti* larval chemosensory navigation is best explained by an chemokinesis search strategy model.

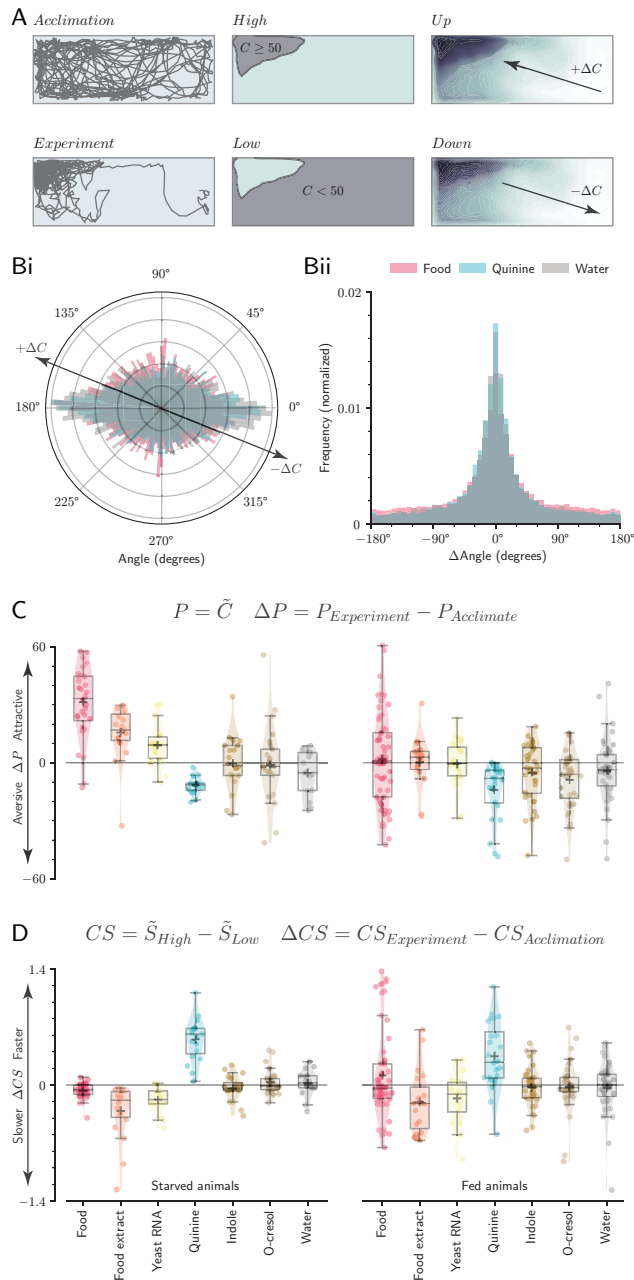

**Figure 3: Larval exploration behavior is best explained by a chemokinesis search model.** A: Diagram of behavioral quantifications. Larvae were observed during a 15-minute acclimation period in clean water, followed by a 15-minute experiment in the presence of the stimulus. The arena was divided into an area of high ( $\geq 50\%$ ) and low concentration ( $< 50\%$ ). Larvae could move in a direction that increased local concentration ( $+\Delta C$ ) or decreased local concentration ( $-\Delta C$ ). Bi: Orientation of animals in the arena throughout the experiment. Larvae did not exhibit directional movement in response to appetitive or aversive stimuli. Note that larvae spend more time moving horizontally ( $0^\circ$ ,  $180^\circ$ ) because the rectangular arena is longer in the horizontal direction. Bii: Larvae did not change frequency of turns ( $\Delta\text{angle}$ ) in response to appetitive or aversive stimuli. C: Box plots for the population median ( $\pm 1$  quartile), population mean (+ marker) and mean response for each individual (dots) for larval preference ( $\Delta P$ ). A horizontal line at 0 represents no change in behavior following stimulus addition. D: As in C, except for stimulus-dependent changes in Concentration-dependent Speed ( $\Delta CS$ ).

115 microbial RNA. RNA is required for *Ae. aegypti* larval  
 116 survival [27], and nucleic acids attract larvae of several  
 117 other mosquito species [28]. Moreover, dissolved RNA  
 118 is released at high levels ( $\mu\text{g}/\text{h}/\text{L}$ ) from growing popu-  
 119 lations of microbes in freshwater habitats [29], and  
 120 could provide valuable foraging information to omni-  
 121 vores such as *Ae. aegypti*. By contrast, other isolated  
 122 macronutrients such as salts, sugars, and amino acids  
 123 elicit little to no attraction [28].

124 *Physiological feeding state affects larval attraction to-*  
 125 *wards ecologically relevant odors*

126 For each of these seven stimuli, we compared the stimu-  
 127 lus preference of larvae before and after stimulus addi-  
 128 tion (Fig 1C, Fig 2A). Preference was defined as the  
 129 median concentration chosen by the larvae throughout  
 130 the 15-minute experiment, normalized to behavior dur-  
 131 ing the previous 15-minute acclimation phase. Starved  
 132 larvae were attracted to food ( $n=32$ ,  $p<0.0001$ ) and  
 133 spent significantly less time near the aversive cue quin-  
 134 ine ( $n=19$ ,  $p<0.0001$ ). Food extract filtered through  
 135 a  $0.2\mu\text{m}$  filter remained attractive ( $n=19$ ,  $p=0.004$ ),  
 136 suggesting that larvae use small, waterborne chemi-  
 137 cal cues to forage. To further investigate these forag-  
 138 ing cues, we next examined responses to microbial  
 139 RNA, and found that RNA was significantly attracti-  
 140 ve ( $n=18$ ,  $p=0.047$ ). Addition of water - a negative  
 141 control for mechanical disturbance - had no impact on  
 142 larval positional preference ( $n=16$ ,  $p=1$ ). Although  
 143 we expected indole and o-cresol, which are attractive  
 144 to adult *Ae. aegypti*, to elicit attraction from larvae,  
 145 neither odorant elicited a change in behavior from the  
 146 acclimation phase (indole:  $n=20$ ,  $p=1$ ; cresol:  $n=25$ ,  
 147  $p=1$ ). Indole tested at a higher concentration ( $10\text{mM}$ )  
 148 also had no effect ( $n=19$ ,  $p=0.28$ ). Together, these  
 149 results suggest that larvae and adults may not neces-  
 150 sarily rely on similar cues to assess larval habitat  
 151 quality.

152 The physiological feeding state of an adult mosquito  
 153 has a strong impact on subsequent behavioral prefer-  
 154 ences [30], and recent work has shown that larvae  
 155 also exhibit appetite-dependent behavioral modifica-  
 156 tions [31]. We thus fed larvae ad libitum to fish food  
 157 before testing their responses to each of the seven  
 158 chemosensory cues (Fig 2B). Fed larvae showed no  
 159 significant attraction to food ( $n=57$ ,  $p=1$ ), food ex-  
 160 tract ( $n=19$ ,  $p=1$ ), and RNA ( $n=20$ ,  $p=1$ ), support-  
 161 ing the prediction that microbial RNA functions as  
 162 an attractant in the context of foraging. Fed lar-  
 163 vae showed no defects in quinine-mediated aversion  
 164 ( $n=24$ ,  $p=0.003$ ), demonstrating that the lack of re-  
 165 sponse to foraging cues is not due to a global reduction  
 166 in chemosensory behavior. Similar to starved larvae,  
 167 fed animals showed no preference for the water control  
 168 ( $n=39$ ,  $p=1$ ) or indole ( $100\mu\text{M}$   $n=36$ ,  $p=0.87$ ,  $10\text{mM}$   
 169  $n=17$ ,  $p=1$ ). Fed larvae exhibited significant aversion  
 170 to o-cresol ( $n=36$ ,  $p=0.024$ ).

171 *Larval exploration behavior is best explained by a*  
172 *chemokinesis search model*

173 Next we investigated the behavioral mechanism by  
174 which *Ae. aegypti* larvae locate sources of odor,  
175 since such information could provide insight into the  
176 chemosensory pathways that mediate the behaviors.  
177 We hypothesized that larval aggregation near attrac-  
178 tive cues such as food is mediated by chemo-klino-taxis  
179 - a common form of directed motion observed in many  
180 animals and microbes [32, 33, 34]. In chemo-klino-  
181 taxis (hereafter chemotaxis), animals exhibit directed  
182 motion with respect to a chemical gradient. Alterna-  
183 tively, larvae may exhibit chemo-ortho-kinesis (here-  
184 after chemokinesis) - a process in which animals re-  
185 spond to local conditions by regulating speed rather  
186 than direction - or chemo-klino-kinesis (hereafter kli-  
187 nokinesis) - in which animals respond to local con-  
188 ditions by regulating turning frequency. Finally, lar-  
189 vae may be unable to detect chemosensory stimuli,  
190 and thus exhibit purely random behavior (hereafter  
191 anosmic). To differentiate between these strategies, we  
192 quantified six observable metrics used to characterize  
193 navigation behavior. By identifying which variables  
194 correlate with stimulus preference, we can infer which  
195 search strategy best explains larval behavior (Table  
196 1). Surprisingly, we found no evidence for chemo-  
197 taxis near attractive or aversive chemicals. Starved  
198 larvae did not exhibit kinematic changes characteris-  
199 tic of chemotaxis, such as directional preference ( $\Delta DP$ ,  
200  $p=0.18$ , Fig S3A). Further, larvae could not increase  
201 odor localization efficiency above random chance: dis-  
202 covery time for all cues was comparable across treat-  
203 ments ( $\Delta D$ ,  $p=1$ , Fig S3B). Larvae also did not per-  
204 form klinokinesis: Turning frequency was unaffected  
205 by either the instantaneous concentration the larvae  
206 experienced ( $\Delta CTI$ ,  $p=1$ , Fig S3C) or change in con-  
207 centration ( $\Delta DTI$ ,  $p=1$ , Fig S3D). Instead, we found  
208 that larval activity was most consistent with chemoki-  
209 nesis. Larvae altered movement speed when experi-  
210 encing high local stimuli conditions ( $\Delta CS$ ,  $p<0.0001$ ,  
211 Fig 3D) but not when moving up or down the concen-  
212 tration map ( $\Delta DS$ ,  $p=1$ , Fig S3E).

213 *Chemokinesis is superior to chemotaxis for avoiding*  
214 *repellents in realistic larval environments*

215 Our results were particularly surprising considering  
216 that many insects use chemotaxis rather than chemoki-  
217 nesis to navigate [35]. Could chemokinesis be unusu-  
218 ally advantageous in microhabitats, such as those uti-  
219 lized by mosquitoes in urban environments? We devel-  
220 oped four data-driven models to simulate larval activ-  
221 ity using chemokinesis, klinokinesis, an anosmic ran-  
222 dom walk, or chemotaxis. In these data-driven mod-  
223 els, larval speed and turn angle was determined at  
224 each time step from a bootstrap resampling of empir-  
225 ical data from all larval trajectories in clean water  
226 ( $n=248$  larvae during the acclimation phase, fed

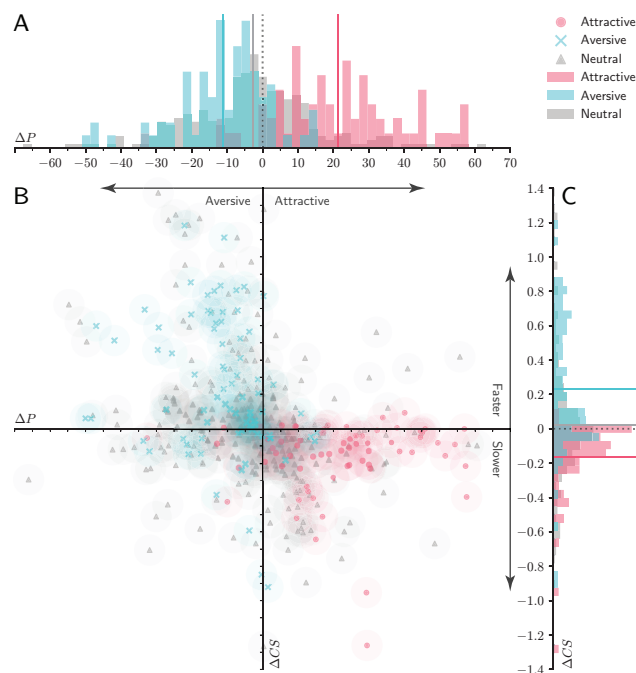

**Figure 4: Larval stimulus preference is correlated to concentration-dependent movement speed.** A: Larval preference ( $\Delta P$ ) significantly correlates with Concentration-dependent Speed ( $\Delta CS$ ). Results from all experiments are shown grouped into three categories: attractive (pink: food, food extract, and yeast RNA in starved larvae), aversive (blue: quinine), and neutral (grey: water, indole, o-cresol in fed and starved larvae; food, food extract, and yeast RNA in fed larvae). B: Normalized frequency histograms of  $\Delta P$ . Mean response to aversive, neutral, and appetitive cues are visualized as solid vertical lines in the corresponding color. A dotted black line at zero indicates the expected outcome if the added stimulus had no effect on larval behavior. C: As in B, except for normalized frequency histograms of larval  $\Delta CS$ .

227 ad libitum.  $n=445,925$  trajectory data points). This  
228 extensive empirical dataset allowed us to investigate  
229 the success of each search strategy while retaining the  
230 characteristics of authentic larval behavior. In addi-  
231 tion, we created an exponential regression model to  
232 simulate diffusion properties observed in our experi-  
233 mental arena ( $p<0.0001$ , Fig S2E). Using these data-  
234 driven representations of larval speed, larval turning  
235 rate, and chemical diffusion in naturalistic larval habi-  
236 tats, we compared the success of each simulated search  
237 strategy in two separate challenges: a foraging task  
238 measuring time elapsed before finding a food source,  
239 and a repellent-avoidance task measuring the propor-  
240 tion of time spent in high-repellent environments. The  
241 success of each search strategy was explored across a  
242 range of common habitat sizes observed in urban en-  
243 vironments [36] (Table 2). If larval chemokinesis is  
244 an adaptation to small urban microhabitats, we ex-  
245 pect the chemokinesis search model to perform bet-  
246 ter than other strategies, and for this difference to be  
247 more apparent at smaller habitat sizes. Indeed, we

248 found that chemokinesis was by far the best strategy  
 249 in the repellent-avoidance task when avoiding poten-  
 250 tially stressful environments (e.g. toxins, pollutants,  
 251 or pesticides). Further, the difference between strate-  
 252 gies was greatest at small habitat sizes (Fig 5A,B).

253 *Starved Aedes aegypti optimize exploration behavior to*  
 254 *increase the probability of finding food*

255 In contrast, chemokinesis was also the worst strat-  
 256 egy in the foraging task, taking over an hour to find  
 257 the simulated food source (Fig 5C,D). However, our  
 258 data-driven models resampled empirical data collected  
 259 from animals fed ad libitum. Many organisms change  
 260 their speed or activity rate when starved [37], and  
 261 we predicted that starved *Ae. aegypti* may also al-  
 262 ter their exploration behavior to increase the proba-  
 263 bility of discovering food [37]. Experimental observa-  
 264 tions showed evidence for starvation-mediated behav-  
 265 ior changes - starved animals spent more time explor-  
 266 ing ( $p < 0.0001$ , Fig 6A) and spent less time near walls  
 267 and corners ( $p < 0.0001$ , Fig 6B). If these starvation-  
 268 mediated behavioral changes are adaptative, we ex-  
 269 pect the data-driven chemokinesis model to perform  
 270 much better at the foraging task when given empirical  
 271 data from starved larvae. Thus we tested the suc-  
 272 cess of each search model in the foraging task using  
 273 bootstrap resampling of empirical data from starved  
 274 animals ( $n=168$  starved larvae during the acclima-  
 275 tion phase,  $n=302,096$  trajectory data points). The  
 276 starved chemokinesis model discovered the food source  
 277 almost an hour faster across all habitat sizes (Fig 6C),  
 278 supporting our hypothesis that starvation-mediated  
 279 changes in larval behavior increase the probability of  
 280 finding food.

281 Nevertheless, starved chemokinesis simulations still  
 282 performed worse than all other strategies in the for-  
 283 aging task. This result, coupled with the runaway  
 284 success of the chemokinesis model in the repellent-  
 285 avoidance task, suggests that avoiding repellents may  
 286 be particularly important for *Ae. aegypti* larval fit-  
 287 ness. If avoiding repellents is essential for *Ae. ae-*  
 288 *gypti*, any starvation-mediated behavioral adaptations  
 289 may be constrained by the additional requirement of  
 290 retaining successful repellent-avoidance behavior. If  
 291 so, we would expect to see very little difference in  
 292 repellent-avoidance success across simulations based  
 293 on empirical data from fed or starved larvae. Our re-  
 294 sults supported these predictions: Although starved  
 295 simulations performed slightly worse compared to fed  
 296 simulations, the difference was small: starved simu-  
 297 lations only spent an average of 1% more time near the  
 298 repellent (Fig S4C).

## 299 Discussion

300 In this study we quantify essential characteristics of  
 301 *Ae. aegypti* larval behavior that are crucial for the

|     | Radius  | Frequency         | Examples           |
|-----|---------|-------------------|--------------------|
| i   | <5cm    | 27.8% of habitats | Ant traps          |
| ii  | 5-9cm   | 9.7% of habitats  | Tin cans, bottles  |
| iii | 9-17cm  | 32.3% of habitats | Jars, bowls, vases |
| iv  | 17-20cm | 3.1% of habitats  | Plates, pails      |

**Table 2: Ecologically realistic habitat sizes analyzed through computational modeling.** A range of habitat sizes were selected from a literature search of realistic habitat sizes for *Ae. aegypti* larvae ([36] and references therein).

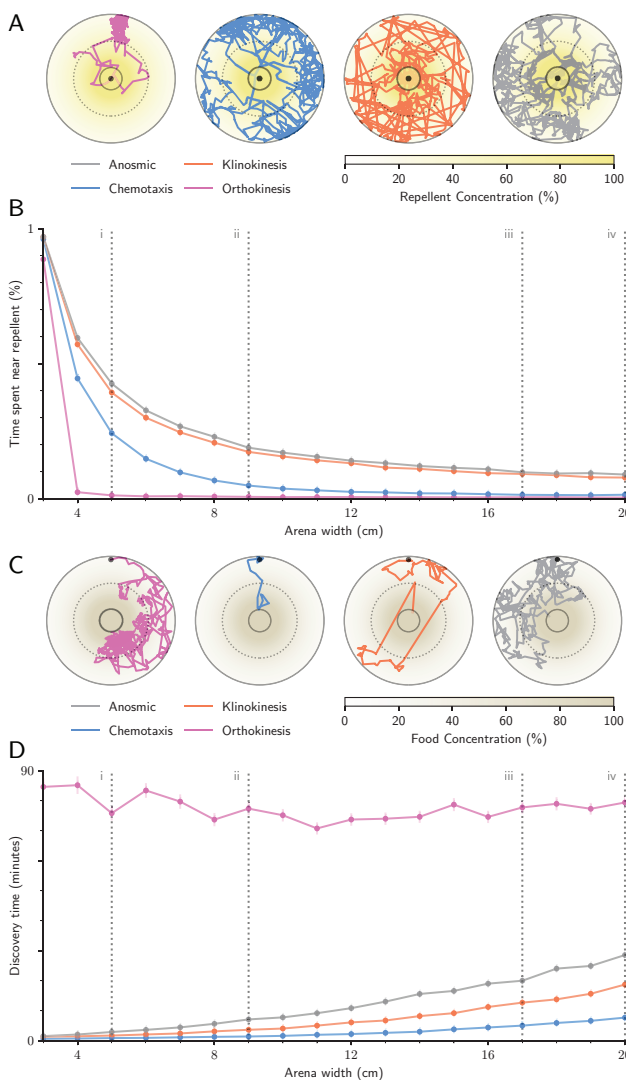

**Figure 5: Chemokinesis is superior to chemotaxis for avoiding repellents in realistic larval environments.** A: Sample trajectories for the repellent-avoidance task. B: Success of each search strategy in the repellent-avoidance task (mean  $\pm$  standard error). C: Sample trajectories for the foraging task. (A,C): Dotted lines mark 50% concentration. Foraging trajectories begin at the top of the 6cm-diameter arena, and repellent-avoidance task trajectories at the arena center (black dot). Starting point was randomized in actual analyses. D: Success of simulated search strategies in the foraging task. (B,D): Dashed grey lines correspond to ecologically relevant habitat sizes described in Table 2.

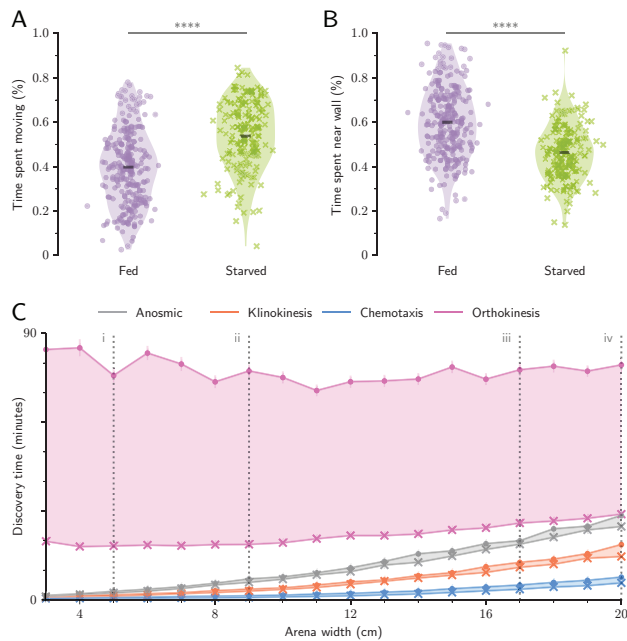

**Figure 6: Starved *Ae. aegypti* optimize exploration behavior to increase the probability of finding food.** A: Starved larvae spend significantly more time exploring the arena than fed larvae. B: Starved larvae spend significantly less time within one body length of an arena wall. (A,B) Violin plot. Dots are the means for each individual, and black bar is the mean across all individuals ( $n > 168$  per treatment); asterisks denote  $p < 0.0001$  (Welch's t-test). C: Simulated chemokinetic larvae using empirical data from starved animals found the food source consistently faster than the same model using data from fed animals. Shaded regions show difference between fed (X markers) and starved (dots) simulations (mean  $\pm$  standard error). Dashed grey lines correspond to ecologically relevant habitat sizes described in Table 2.

development of future studies. Further, we identify previously unknown behaviors that highlight the unique evolutionary history and developmental biology of these disease vector mosquitoes. First, we show that larvae perceive microbial RNA as a foraging attractant, but do not respond to several olfactory cues that attract adult *Ae. aegypti* for oviposition. Second, we demonstrate that *Ae. aegypti* larvae use chemokinesis, rather than chemotaxis, to navigate with respect to chemical sources. Using data-driven computational modeling, we further show that chemokinesis is superior to chemotaxis in avoiding repellents in ecologically relevant larval habitat sizes. Finally, we use experimental observations and computational analyses to demonstrate that larvae respond to starvation pressure by changing their behavior to increase the probability of finding a scarce food source without compromising their ability to successfully avoid repellents.

These results are fascinating from both a developmental biology and disease prevention perspective. In their adult form and during flight, *Ae. aegypti* exhibit an odor-tracking behavior termed odor-conditioned optomotor anemotaxis, where encounter with an odor

gates an upwind surge in the wind direction [38]. In this behavior, successive odor encounters are necessary to prolong the upwind flight towards the upwind odor source, and the gradient information is not necessary to elicit the upwind responses. In other insects, such as *D. melanogaster*, while walking but not flying, these animals exhibit a form of chemotactic behavior where bilateral comparisons are made between antenna [39]. It remains unclear whether walking adult *Ae. aegypti* may also exhibit similar chemotactic behaviors, but given the differences between adult and larval responses, this species may provide an excellent developmental model to identify neurobiological pathways integral to olfactory navigation. Previous studies on mosquito larvae can further contextualize our results and provide additional insight. Unlike *Ae. aegypti*, *Anopheles gambiae* mosquito larvae prefer both indole and o-cresol, in addition to many other olfactory stimuli [23]. The stark differences in larval chemosensory behavior mirror the many differences observed between the adults of these two species [40], and suggests that studies should be cautious of generalizing among disease vector mosquitoes.

Although adult *Ae. aegypti* feeding is regulated by ATP perception [41], we are unaware of other work demonstrating RNA attraction in *Ae. aegypti* larvae. In our state-dependent preference experiments, we investigate the ecological basis of larval RNA attraction, and propose that RNA may function as a foraging indicator in the larval environment. Although the receptor responsible for RNA detection is unknown, work in *D. melanogaster* suggests that a gustatory or ionotropic receptor may be more likely candidates than an olfactory receptor. In addition, an earlier study demonstrated that olfactory deficient (*orco*  $-/-$ ) *Ae. aegypti* larvae showed no defects in attraction to food or avoidance of quinine [22]. Taken together, our results support the hypothesis that sensory information gained from gustatory or ionotropic receptors may be more integral to larval chemosensation than olfactory receptors. Further, larval attraction to RNA suggests that the importance of nucleotide phagostimulation is preserved throughout a mosquito's life cycle, from larval foraging to adult blood engorgement and oviposition.

Our computational experiments suggest an ecological basis for the lack of chemotaxis in *Ae. aegypti* larvae. Although our experiments showed that chemotaxis is superior to chemokinesis in foraging, chemokinesis surpassed chemotaxis, klinokinesis and anosmic strategies in avoiding repellents. This suggests that the role of chemosensation in larvae is primarily tuned toward aversive responses. Indeed, known characteristics of larval physiology support this idea. Although larvae can survive for up to a week without food, they quickly succumb to toxic bacterial byproducts [10, 42]. We propose that *Ae. aegypti* larvae combat starvation pressure primarily through physiological adaptations

382 such as fat stores, and resist toxins in the environment  
383 through chemosensory behaviors optimized for avoid-  
384 ing repellents.

385 Our study also raises a number of comparative ques-  
386 tions that could be addressed in future research. For  
387 instance, is chemokinesis in mosquito larvae associated  
388 with generalized spatial restriction, or with human as-  
389 sociation and man-made containers in particular? Fu-  
390 ture studies could compare chemotactic ability in other  
391 spatially constrained mosquitoes, such as *Toxorhyn-*  
392 *chites* (which inhabit tree holes) or *Aedes albopictus*  
393 (another container-breeding mosquito) [43], to species  
394 that oviposit in larger bodies of water such as *Aedes*  
395 *togoi* (marine rock pools) or opportunistic species such  
396 as *Culex nigripalpus* that oviposit in a wide range  
397 of habitat sizes [43, 44]. Additionally, computational  
398 modeling of fluid dynamics and larval movement may  
399 help determine whether chemotaxis is physically chal-  
400 lenging in small, man-made environments. Shallow  
401 gradients in small containers may diffuse too quickly  
402 to be used as a reliable chemical signal - particularly  
403 considering our results showing that larval movement  
404 significantly increases stimulus diffusion [45].

405 Synanthropic mosquitoes are increasingly important  
406 to global health as urbanization progresses: Currently  
407 over half of all humans live in urban environments,  
408 and this proportion is only expected to increase [46].  
409 Adaptations that facilitate human cohabitation, like  
410 specialized larval foraging strategies, are vital to our  
411 understanding of mosquito behavior and success as a  
412 disease vector [9].

## 413 Materials and Methods

### 414 *Insects*

415 Wild-type *Ae. aegypti* (Costa Rica strain MRA-726,  
416 MR4, ATCC Manassas Virginia) were maintained in a  
417 laboratory colony as previously described [47]. Exper-  
418 iment larvae were separated within 24 hours of hatch-  
419 ing and reared at a density of 75 per tray (26x35x4cm).  
420 One day before the experiment, 4-day-old larvae were  
421 isolated in Falcon<sup>TM</sup> 50mL conical centrifuge tubes  
422 (Thermo Fischer Scientific, Waltham, MA, USA) con-  
423 taining ~15mL milliQ water. Starved larvae were de-  
424 nied food for at least 24 hours before the experiment.  
425 Animals that died before eclosion or pupated during  
426 the experiment were omitted. Because it was not pos-  
427 sible to detect younger larvae using our video track-  
428 ing paradigm, we mitigated possible age-related be-  
429 havioral confounds by standardizing the age of exper-  
430 imental larvae.

### 431 *Behavior arena and experiment*

432 We previously developed a paradigm to investigate  
433 chemosensory preference in larval *Ae. aegypti* [22].  
434 In this study we expanded our protocol by mapping

435 the chemosensory environment in our arena using flu-  
436 orescein dye. 100 $\mu$ L of fluorescein dye was added to  
437 a white arena of the same material and dimensions,  
438 each containing one *Ae. aegypti* larva. Dye color  
439 was converted to concentration values using a stan-  
440 dardization dataset of 13 reference concentrations (Fig  
441 S2C). Dye diffusion through time was quantified by  
442 the mean of all values in each 1mm<sup>2</sup> area, linearly in-  
443 terpolated throughout time (n=10, Fig S2B). During  
444 behavior experiments, we recorded animals for 15 min-  
445 utes before each experiment to analyze baseline activ-  
446 ity and confirm that the arena was fair in the absence  
447 of chemosensory cues. Subsequently, 100 $\mu$ L of a chem-  
448 ical stimulus was gently pipetted into the left side of  
449 the arena to minimize mechanosensory disturbances,  
450 and larval activity was recorded for another 15 min-  
451 utes (Fig 1C).

### 452 *Selection and preparation of odorants*

453 Odorants (indole, o-cresol) were prepared at 100 $\mu$ M in  
454 milliQ water (Aldrich #W259306; Aldrich #44-2361).  
455 Indole was also prepared similarly at 10mM. Quinine  
456 hydrochloride was prepared at 10mM in milliQ water  
457 (Aldrich #Q1125). Larval food (Petco; Hikari Tropic  
458 First Bites) was prepared at 0.5% by weight in milliQ  
459 water and mixed thoroughly before each experiment  
460 to resuspend food particles. To prepare the food ex-  
461 tract solution, 0.5% food was dissolved in milliQ water  
462 for one hour and filtered through a 0.2 $\mu$ m filter (VWR  
463 International #28145-477). For the yeast RNA solu-  
464 tion, total RNA from *Saccharomyces cerevisiae* yeast  
465 was prepared at 0.1% by weight in DEPC-treated, au-  
466 toclaved 0.2 $\mu$ m filtered water (Aldrich #10109223001;  
467 Ambion #AM9916). Yeast RNA, food, and food ex-  
468 tract were prepared fresh daily. Although chemicals  
469 diffuse at different rates depending on molecular size  
470 and physico-chemical properties, diffusion coefficients  
471 in water were unavailable for the majority of chemi-  
472 cals tested. Therefore, it is important to note that our  
473 chemical diffusion map is an approximation of the ac-  
474 tual chemosensory environment experienced by larvae.

### 475 *Video Analyses*

476 Video data was obtained and processed as previously  
477 described [22] using Multitracker software by Floris  
478 van Breugel [48] and Python version 3.6.2. Addition-  
479 ally, approximate larval length was measured for each  
480 animal in ImageJ Fiji [49], as the pixel length from  
481 head to tail, in a selected video frame that showed the  
482 larva in a horizontal position. Lengths were converted  
483 to mm using the known inner container width as the  
484 conversion ratio. Experimenters were blind to larval  
485 sex when measuring lengths. Throughout our analyses,  
486 the arena was divided into areas of high concentra-  
487 tion ( $\geq 50\%$  initial stimulus) and low concentration



488 (<50%). Larvae could move in a direction that in-  
489 creased local concentration or decreased local concen-  
490 tration. We discounted concentration changes caused  
491 by diffusion while the larvae remained immobile. A  
492 threshold of  $\Delta 2\%/s$  was required to qualify as moving  
493 up or down the concentration map.

#### 494 *Statistical Analyses*

495 Statistical analyses were performed in R version 3.5.1  
496 [50]. A Bonferroni-Holm correction was applied to all  
497 statistical analyses. A Mann-Whitney test was used  
498 to compare body length of fed and starved males and  
499 females (Fig S1A). Linear least squares regression was  
500 used to assess the effect of time of day to animal speed,  
501 time spent moving, and time spent near walls dur-  
502 ing the acclimation phase (Fig S1B-D). Paired-samples  
503 Welch's t-tests were used to compare the median chem-  
504 ical concentration chosen by the larvae throughout the  
505 15-minute experiment to the behavior of the same lar-  
506 vae throughout the 15-minute acclimation phase. This  
507 preference metric was also quantified a single value  
508 ( $\Delta P$ ,  $P_{Experiment} - P_{Acclimation}$ , Fig 3, Fig 4). For all  
509 subsequent analyses on behavioral mechanisms, larval  
510 behavior during the acclimation phase was subtracted  
511 from larval activity during the experiment phase to  
512 normalize for differences between individuals and lar-  
513 val preference for corners and walls. When investi-  
514 gating potential differences between attraction and  
515 aversion behaviors, we grouped stimuli into cues that  
516 elicited significant attraction ( $\Delta P > 0$ ,  $p < 0.05$ ), signif-  
517 icant repulsion ( $\Delta P < 0$ ,  $p < 0.05$ ), or neutral response  
518 ( $p \geq 0.05$ ). A Kruskal-Wallis test was used to compare  
519 behavioral metrics among these three stimuli classes  
520 (Fig 3D, Fig 4, Fig S3). These other behavioral met-  
521 rics included directional Preference ( $\Delta DP$ ), defined as  
522 the difference in time moving up or down the concen-  
523 tration map; Discovery time ( $\Delta D$ ), defined as the time  
524 elapsed before initial encounter of high ( $\geq 50\%$ ) con-  
525 centration of the stimulus; Concentration-dependent  
526 Speed (CS), defined as the difference in speed at  
527 high ( $\geq 50\%$ ) and low ( $< 50\%$ ) local concentrations;  
528  $\Delta$ Concentration-dependent Speed ( $\Delta DS$ ), defined as  
529 the difference in speed while moving up or down the  
530 concentration map; Concentration-dependent Turn In-  
531 cidence ( $\Delta CTI$ ), defined as the difference in turning  
532 rate (turns per second, turns defined as instantaneous  
533 change in angle of  $> 30^\circ$ ) at high and low local con-  
534 centrations; and  $\Delta$ Concentration-dependent Turn In-  
535 cidence ( $\Delta DTI$ ), defined as the difference in turning  
536 rate while moving up or down the concentration map.  
537 For statistical analyses, larvae that never entered ar-  
538 eas of high concentration were assigned a  $\Delta D$  of 15  
539 minutes, corresponding to the end of the experiment,  
540 and a  $\Delta CS$  and  $\Delta CTI$  of 0 (placeholder values chosen  
541 to reduce Type I error).

#### 542 *Computational Modeling*

543 We developed four data-driven models to investigate  
544 larval exploration success in different environments.  
545 The empirical dataset used in these models represented  
546 all data points taken from larvae observed in clean wa-  
547 ter before the addition of experimental stimuli ( $n=248$   
548 fed,  $n=168$  starved). In the foraging task, simulated  
549 animals explored until they encountered a food source  
550 at the center of the arena (scaled to arena size, com-  
551 prising 3% of total area). This discovery time was  
552 recorded for each of 1000 simulations per arena size  
553 and per model. In the repellent-avoidance task, simu-  
554 lated larvae explored for 15 minutes, and the percent-  
555 age of time spent within  $\geq 50\%$  of the repellent was  
556 recorded. We defined the simulated chemical bound-  
557 ary conditions using an exponential regression model  
558 of distance and concentration based on our chemical  
559 map data (Fig S2E). All simulated larvae began at a  
560 random point within the arena. In the anosmic model,  
561 instantaneous speed and angle was randomly sampled  
562 from the empirical dataset and applied to the larval  
563 trajectory at each time step (2fps). The chemokine-  
564 sis model explored while sampling chemical concen-  
565 tration. In this model the empirical dataset of inst-  
566 antaneous speed was sorted and split into slow and  
567 fast halves. If food concentration was  $\geq 50\%$  (or re-  
568 pellant concentration was  $< 50\%$ ), speed was sampled  
569 from the slow half. If food concentration was  $< 50\%$   
570 (or repellent concentration was  $\geq 50\%$ ) speed was sam-  
571 pled from the fast half. In the chemotaxis model,  
572 if food concentration increased by  $\geq 1\%$  (or repellent  
573 concentration decreased by  $\geq 1\%$ ), the animal contin-  
574 ued in the same direction for the next movement step.  
575 Similarly, for klinokinesis the animal continued in the  
576 same direction for the next movement step if the lo-  
577 cal concentration was  $\geq 50\%$  (foraging task) or  $< 50\%$   
578 (repellent-avoidance task). For chemotaxis we simu-  
579 lated a range of biologically plausible concentration  
580 sensitivities ranging from 0.1% to 10% and found that  
581 this did not affect our conclusions (Fig S4A,B).

#### 582 **Acknowledgements**

583 This work was supported in part by the National Institute of  
584 Health grant 1RO1DC013693-04 to J.A.R.; National Science  
585 Foundation grants IOS-1354159 to J.A.R. and DGE-1256082 to  
586 E.K.L.; Air Force Office of Sponsored Research under grant  
587 FA9550-16-1-0167 to J.A.R.; and the Robin Mariko Harris  
588 Award to E.K.L. We thank Floris van Breugel for assistance with  
589 video data analysis, the University of Washington Biostatistics  
590 Consulting Group for statistical advice, and Binh Nguyen and  
591 Kara Kiyokawa for maintaining the Riffell lab mosquito colony.  
592 We also thank Thomas Daniel, Bingni Brunton, Kameron Har-  
593 ris, and the Kincaid 320 Python Club for insightful discussions  
594 on programming and data management.

#### 595 **Author Contributions**

596 Conceptualization: E.K.L. and J.A.R.; Methodology: E.K.L.  
597 and J.A.R.; Software: E.K.L.; Investigation: E.K.L. and T.S.G.;

598 Resources: E.K.L. and J.A.R.; Data Curation: E.K.L; Writing -  
599 Original Draft: E.K.L; Writing - Review Editing: E.K.L, J.A.R,  
600 and T.S.G.; Visualization: E.K.L; Supervision: J.A.R; Project  
601 administration: J.A.R; Funding acquisition: E.K.L. and J.A.R.

## 602 **Declaration of Interests**

603 The authors declare no competing interests.

## References

- [1] S. C. Weaver, C. Charlier, N. Vasilakis, M. Lecuit, Zika, chikungunya, and other emerging Vector-Borne viral diseases, *Annu. Rev. Med.* 69 (2018) 395–408.
- [2] J. R. Powell, W. J. Tabachnick, History of domestication and spread of *aedes aegypti*—a review, *Mem. Inst. Oswaldo Cruz* 108 Suppl 1 (2013) 11–17.
- [3] J. E. Brown, B. R. Evans, W. Zheng, V. Obas, L. Barrera-Martinez, A. Egizi, H. Zhao, A. Caccone, J. R. Powell, Human impacts have shaped historical and recent evolution in *aedes aegypti*, the dengue and yellow fever mosquito, *Evolution* 68 (2) (2014) 514–525.
- [4] C. Schapheer, G. Sandoval, C. A. Villagra, Pest cockroaches may overcome environmental restriction due to anthropization, *J. Med. Entomol.*
- [5] A. Y. T. Feng, C. G. Himsforth, The secret life of the city rat: a review of the ecology of urban norway and black rats (*rattus norvegicus* and *rattus rattus*), *Urban Ecosyst.* 17 (1) (2014) 149–162.
- [6] J. M. Marzluff, K. J. McGowan, R. Donnelly, R. L. Knight, Causes and consequences of expanding american crow populations, in: J. M. Marzluff, R. Bowman, R. Donnelly (Eds.), *Avian Ecology and Conservation in an Urbanizing World*, Springer US, Boston, MA, 2001, pp. 331–363.
- [7] K. P. Aplin, H. Suzuki, A. A. Chinen, R. T. Chesser, J. Ten Have, S. C. Donnellan, J. Austin, A. Frost, J. P. Gonzalez, V. Herbreteau, F. Catzeflis, J. Soubrier, Y.-P. Fang, J. Robins, E. Matisoo-Smith, A. D. S. Bastos, I. Maryanto, M. H. Sinaga, C. Denys, R. A. Van Den Bussche, C. Conroy, K. Rowe, A. Cooper, Multiple geographic origins of commensalism and complex dispersal history of black rats, *PLoS One* 6 (11) (2011) e26357.
- [8] D. Raoult, G. Aboudharam, E. Crubézy, G. Larrouy, B. Ludes, M. Drancourt, Molecular identification by “suicide PCR” of *yersinia pestis* as the agent of medieval black death, *Proc. Natl. Acad. Sci. U. S. A.* 97 (23) (2000) 12800–12803.
- [9] D. J. Gubler, E. E. Ooi, S. Vasudevan, J. Farrar, *Dengue and Dengue Hemorrhagic Fever*, 2nd Edition, CABI, 2014.
- [10] S. Christophers, *Aedes aegypti* (L.) the yellow fever mosquito: its life history, bionomics and structure, *Aedes aegypti* (L.) the Yellow Fever Mosquito: its Life & Aeg.
- [11] H. Briegel, Metabolic relationship between female body size, reserves, and fecundity of *aedes aegypti*, *J. Insect Physiol.* 36 (3) (1990) 165–172.
- [12] R. S. Nasci, Influence of larval and adult nutrition on biting persistence in *aedes aegypti* (diptera: Culicidae), *J. Med. Entomol.* 28 (4) (1991) 522–526.
- [13] E. K. Lutz, C. Lahondère, C. Vinauger, J. A. Riffell, Olfactory learning and chemical ecology of olfaction in disease vector mosquitoes: a life history perspective, *Curr Opin Insect Sci* 20 (2017) 75–83.
- [14] J. J. Skiff, D. A. Yee, Behavioral differences among four co-occurring species of container mosquito larvae: Effects of depth and resource environments, *J. Med. Entomol.* 51 (2) (2014) 375–381.
- [15] M. H. Reiskind, M. Shawn Janairo, Tracking *aedes aegypti* (diptera: Culicidae) larval behavior across development: Effects of temperature and nutrients on individuals’ foraging behavior, *J. Med. Entomol.*
- [16] J. B. Z. Zahouli, B. G. Koudou, P. Müller, D. Malone, Y. Tano, J. Utzinger, Urbanization is a main driver for the larval ecology of *aedes* mosquitoes in arbovirus-endemic settings in south-eastern côte d’ivoire, *PLoS Negl. Trop. Dis.* 11 (7) (2017) e0005751.
- [17] S. Benhamou, P. Bovet, How animals use their environment: a new look at kinesis, *Anim. Behav.* 38 (3) (1989) 375–383.
- [18] S. G. Pavlovich, C. L. Rockett, Color, bacteria, and mosquito eggs as ovipositional attractants for *aedes aegypti* and *aedes albopictus* (diptera: Culicidae), *Great Lakes Entomol.* 33 (2) (2018) 7.
- [19] M. Kaiser, M. Cobb, The behaviour of *drosophila melanogaster* maggots is affected by social, physiological and temporal factors, *Anim. Behav.* 75 (5) (2008) 1619–1628.
- [20] R. Van Pletzen, LARVAL AND PUPIL BEHAVIOUR IN *CULISETA LONGIAREOLATA* (MACQUART, 1838)(CULICIDAE, DIPTERA), *Journal of the Linnological Society of Southern Africa* 7 (1) (1981) 24–28.
- [21] J. R. Clopton, A circadian rhythm in spontaneous locomotor activity in the larvae and pupae of the mosquito, *culiseta incidens*, *Physiol. Entomol.* 4 (3) (1979) 201–207.
- [22] M. Bui, J. Shyong, E. K. Lutz, T. Yang, M. Li, K. Truong, R. Arvidson, A. Buchman, J. A. Riffell, O. S. Akbari, Live calcium imaging of *aedes aegypti* neuronal tissues reveals differential importance of chemosensory systems for life-history-specific foraging strategies (Jun. 2018).
- [23] Y. Xia, G. Wang, D. Buscariollo, R. J. Pitts, H. Wenger, L. J. Zwiebel, The molecular and cellular basis of olfactory-driven behavior in *anopheles gambiae* larvae, *Proc. Natl. Acad. Sci. U. S. A.* 105 (17) (2008) 6433–6438.
- [24] C. Rusch, E. Roth, C. Vinauger, J. A. Riffell, Correction: Honeybees in a virtual reality environment learn unique combinations of colour and shape, *J. Exp. Biol.* 220 (Pt 24) (2017) 4746.
- [25] A. El-Keredy, M. Schleyer, C. König, A. Ekim, B. Gerber, Behavioural analyses of quinine processing in choice, feeding and learning of larval *drosophila*, *PLoS One* 7 (7) (2012) e40525.
- [26] A. Afify, C. G. Galizia, Chemosensory cues for mosquito oviposition site selection, *J. Med. Entomol.* 52 (2) (2015) 120–130.
- [27] S. Akov, A qualitative and quantitative study of the nutritional requirements of *aedes aegypti* l. larvae, *J. Insect Physiol.* 8 (3) (1962) 319–335.
- [28] R. W. Merritt, R. H. Dadd, E. D. Walker, Feeding behavior, natural food, and nutritional relationships of larval mosquitoes, *Annu. Rev. Entomol.* 37 (1992) 349–376.
- [29] E. a. Paul JH, Production of dissolved DNA, RNA, and protein by microbial populations in a florida reservoir. - PubMed - NCBI, <https://www.ncbi.nlm.nih.gov/pubmed/1704697>, accessed: 2018-12-18.
- [30] W. Takken, J. J. A. van Loon, W. Adam, Inhibition of host-seeking response and olfactory responsiveness in *anopheles gambiae* following blood feeding (2001).

- [31] M. P. Kinney, N. D. Panting, T. M. Clark, Modulation of appetite and feeding behavior of the larval mosquito aedes aegypti by the serotonin-selective reuptake inhibitor paroxetine: shifts between distinct feeding modes and the influence of feeding status, *J. Exp. Biol.* 217 (Pt 6) (2014) 935–943.
- [32] H. C. Berg, D. A. Brown, Chemotaxis in escherichia coli analysed by three-dimensional tracking, *Nature* 239 (5374) (1972) 500–504.
- [33] G. Röder, M. Mota, T. C. J. Turlings, Host plant location by chemotaxis in an aquatic beetle, *Aquat. Sci.* 79 (2) (2017) 309–318.
- [34] Y. H. Hussain, J. S. Guasto, R. K. Zimmer, R. Stocker, J. A. Riffell, Sperm chemotaxis promotes individual fertilization success in sea urchins, *J. Exp. Biol.* 219 (Pt 10) (2016) 1458–1466.
- [35] A. Gomez-Marin, G. J. Stephens, M. Louis, Active sampling and decision making in drosophila chemotaxis, *Nat. Commun.* 2 (2011) 441.
- [36] K. L. Chan, B. C. Ho, Y. C. Chan, Aedes aegypti (l.) and aedes albopictus (skuse) in singapore city. 2. larval habitats, *Bull. World Health Organ.* 44 (5) (1971) 629–633.
- [37] M. de Jager, F. Bartumeus, A. Kölzsch, F. J. Weissing, G. M. Hengeveld, B. A. Nolet, P. M. J. Herman, J. van de Koppel, How superdiffusion gets arrested: ecological encounters explain shift from lévy to brownian movement, *Proc. Biol. Sci.* 281 (1774) (2014) 20132605.
- [38] F. van Breugel, J. Riffell, A. Fairhall, M. H. Dickinson, Mosquitoes use vision to associate odor plumes with thermal targets, *Curr. Biol.* 25 (16) (2015) 2123–2129.
- [39] Q. Gaudry, E. J. Hong, J. Kain, B. L. de Bivort, R. I. Wilson, Asymmetric neurotransmitter release enables rapid odour lateralization in drosophila (2012).
- [40] J. Bohbot, R. J. Pitts, H.-W. Kwon, M. Rützler, H. M. Robertson, L. J. Zwiebel, Molecular characterization of the aedes aegypti odorant receptor gene family, *Insect Mol. Biol.* 16 (5) (2007) 525–537.
- [41] R. Galun, L. C. Koontz, R. W. Gwadz, J. M. C. Ribeiro, Effect of ATP analogues on the gorging response of aedes aegypti, *Physiol. Entomol.* 10 (3) (1985) 275–281.
- [42] T. G. Floore, Mosquito larval control practices: past and present, *J. Am. Mosq. Control Assoc.* 22 (3) (2006) 527–533.
- [43] D. F. Hoel, P. J. Obenauer, M. Clark, R. Smith, T. H. Hughes, R. T. Larson, J. W. Diclaros, S. A. Allan, Efficacy of ovitrap colors and patterns for attracting aedes albopictus at suburban field sites in north-central florida, *J. Am. Mosq. Control Assoc.* 27 (3) (2011) 245–251.
- [44] M. Bentley, Chemical ecology and behavioral aspects of mosquito oviposition (1989).
- [45] A. M. Hein, D. R. Brumley, F. Carrara, R. Stocker, S. A. Levin, Physical limits on bacterial navigation in dynamic environments, *J. R. Soc. Interface* 13 (114) (2016) 20150844.
- [46] M. A. Goddard, A. J. Dougill, T. G. Benton, Scaling up from gardens: biodiversity conservation in urban environments, *Trends Ecol. Evol.* 25 (2) (2010) 90–98.
- [47] C. Vinauger, E. K. Lutz, J. A. Riffell, Olfactory learning and memory in the disease vector mosquito aedes aegypti, *J. Exp. Biol.* 217 (Pt 13) (2014) 2321–2330.
- [48] F. van Breugel, A. Huda, M. H. Dickinson, Distinct activity-gated pathways mediate attraction and aversion to CO<sub>2</sub> in drosophila, *Nature*.
- [49] J. Schindelin, I. Arganda-Carreras, E. Frise, V. Kaynig, M. Longair, T. Pietzsch, S. Preibisch, C. Rueden, S. Saalfeld, B. Schmid, J.-Y. Tinevez, D. J. White, V. Hartenstein, K. Eliceiri, P. Tomancak, A. Cardona, Fiji: an open-source platform for biological-image analysis, *Nat. Methods* 9 (7) (2012) 676–682.
- [50] Website, R Core Team (2013). R: A language and environment for statistical computing. R Foundation for Statistical Computing, Vienna, Austria. URL <http://www.R-project.org/>, accessed: 2019-3-18.

## Supplementary materials

### Supplementary Data and Code

All code is available for download at [github.com/eleanorlutz/aedes-aegypti-2019](https://github.com/eleanorlutz/aedes-aegypti-2019)

### Supplementary Figures

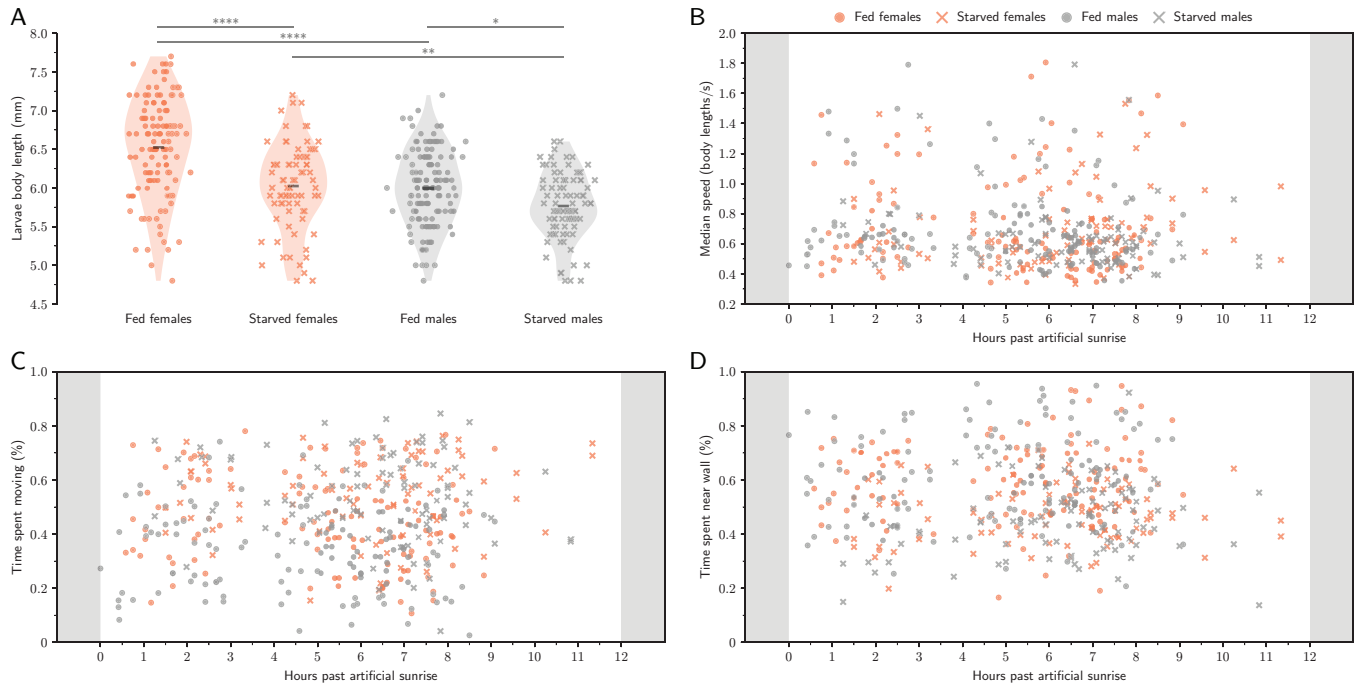

**Figure S1: Effects of sex, physiological state, and circadian timing on larval physiology.** A-D: Fed females (orange dots,  $n=120$ ) and males (grey dots,  $n=128$ ), starved females (orange X markers,  $n=79$ ) and males (grey X markers,  $n=89$ ). A: Violin plot. Scatter points show the body length (mm) for each individual, and the black bar is the mean across all individuals; asterisks denote significance values (Welch's t-test). Larval body length is influenced by sex and starvation state. B: No change was observed in median speed (body lengths/s). Note that the sampling rate throughout the day was not consistent due to the work schedule of experimenters involved in the project. C: No change was observed in time spent moving throughout daylight hours. D: No change was observed in proportion of time spent within one body length of the wall throughout daylight hours.

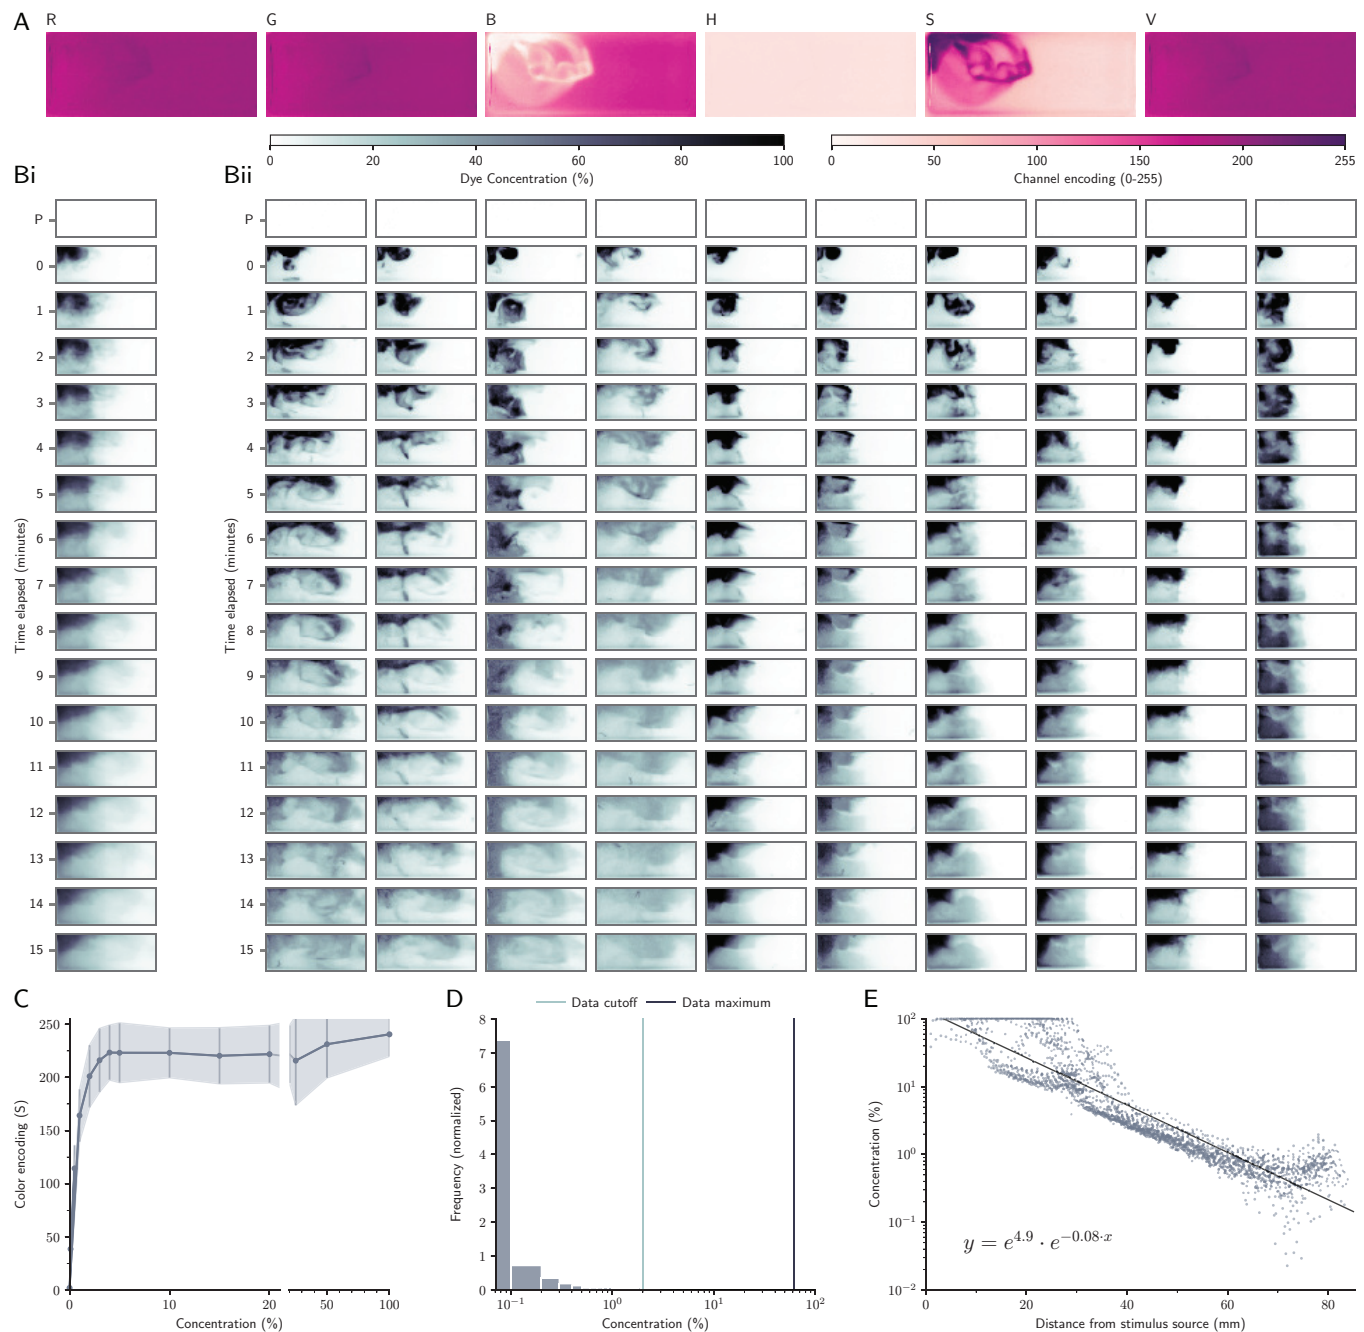

**Figure S2: Creating a concentration gradient map to analyze and model larval search behavior.** A: To quantify fluorescein dye diffusion, photographs were taken every minute using a Canon PowerShot ELPH 320 HS camera. Of the available color information channels (RGB, HSV), the saturation channel (S) contained the most information and was used to represent dye color throughout image analyses. Bi: Dye diffusion through time was quantified by the mean of all values in each 1mm<sup>2</sup> area, linearly interpolated through time (n=10 experiments containing larvae). A control photograph was taken before the start of each experiment (P) but was not used to construct the chemical gradient map. Bii: Individual variation between trials. Each column represents data from one experiment through time. C: Dye color (S) was converted to raw concentration values using a standardization dataset of 13 reference concentrations. 20mL of each reference concentration was poured into the entire arena and photographed. D: Because 100 $\mu$ L of dye is immediately diluted in the 20mL behavior arena water volume, reference concentration colors could not be used to directly convert color to % maximum concentration. Instead, the maximum concentration value was normalized to  $\geq 95\%$  of all color measurements across all experiments. E: To create a concentration map for computational simulations in different arena sizes, we analyzed the relationship between concentration and distance from stimulus source at time=0. Concentration values for individual 1x1mm<sup>2</sup> sections across all 10 experiments at time=0 (dots).

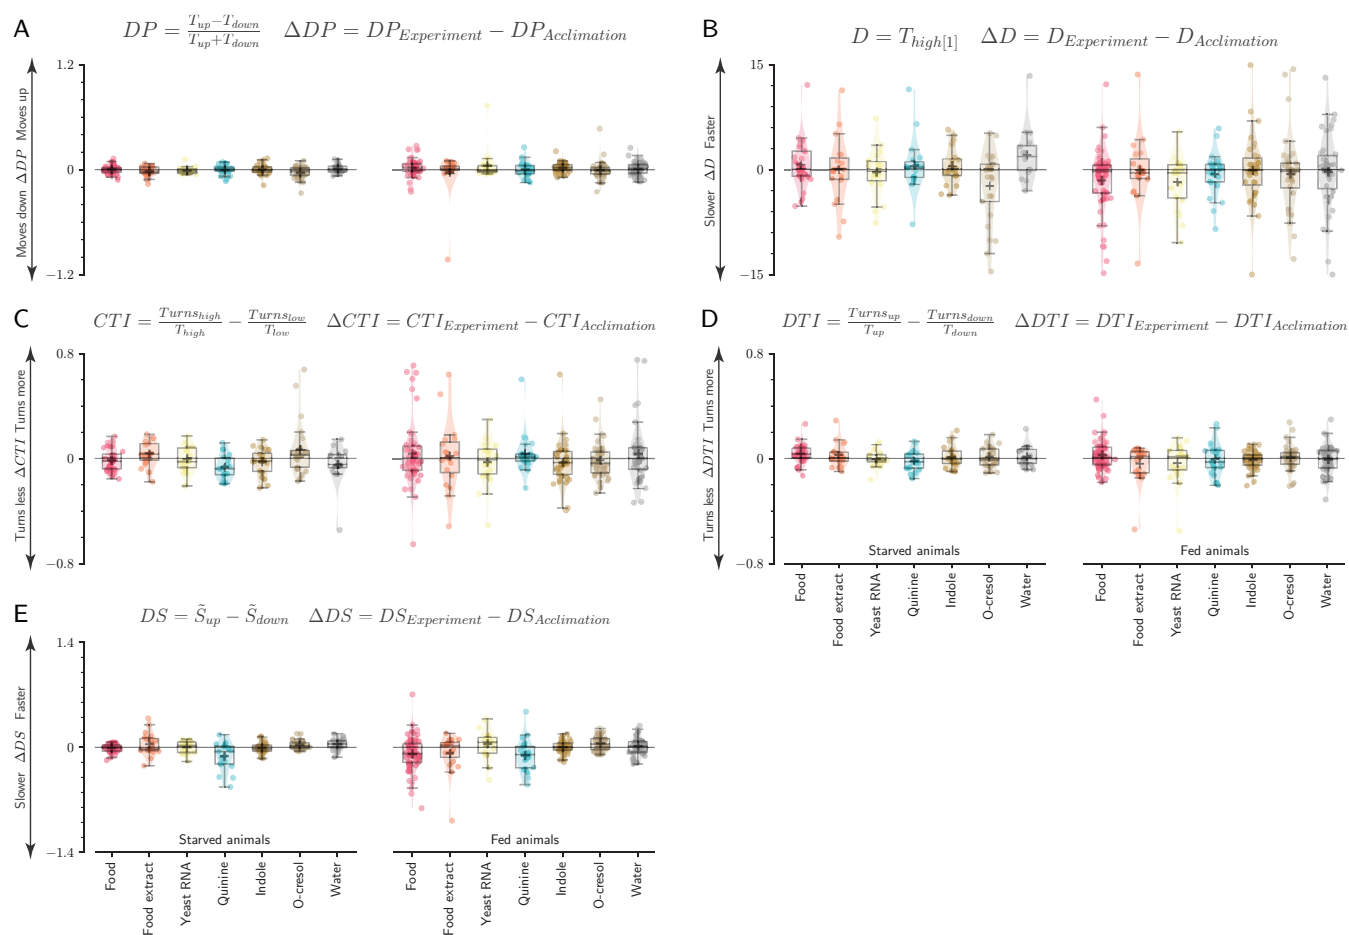

**Figure S3: Larval behavior is not consistent with chemotaxis or klinokinesis search strategy models.** A-E: Box plots for the population median ( $\pm 1$  quartile), population mean (+ marker) and mean response for each individual (dots). We observed no significant changes across stimuli for any of these five behavioral metrics ( $p > 0.05$ , Kruskal-Wallis test). A: Directional Preference  $\Delta DP$ , difference in time ( $T$ ) moving up or down the concentration map. B: Discovery time  $\Delta D$ , time ( $T$ ) elapsed before initial encounter of high concentration ( $\geq 50\%$ ). C: Concentration-dependent Turn Incidence  $\Delta CTI$ , difference in turning rate at high and low local concentrations. D:  $\Delta$ Concentration-dependent Turn Incidence  $\Delta DTI$ , difference in turning rate while moving up or down concentration. E:  $\Delta$ Concentration-dependent Speed  $\Delta DS$ , difference in mean speed ( $\hat{S}$ ) while moving up or down the concentration map.

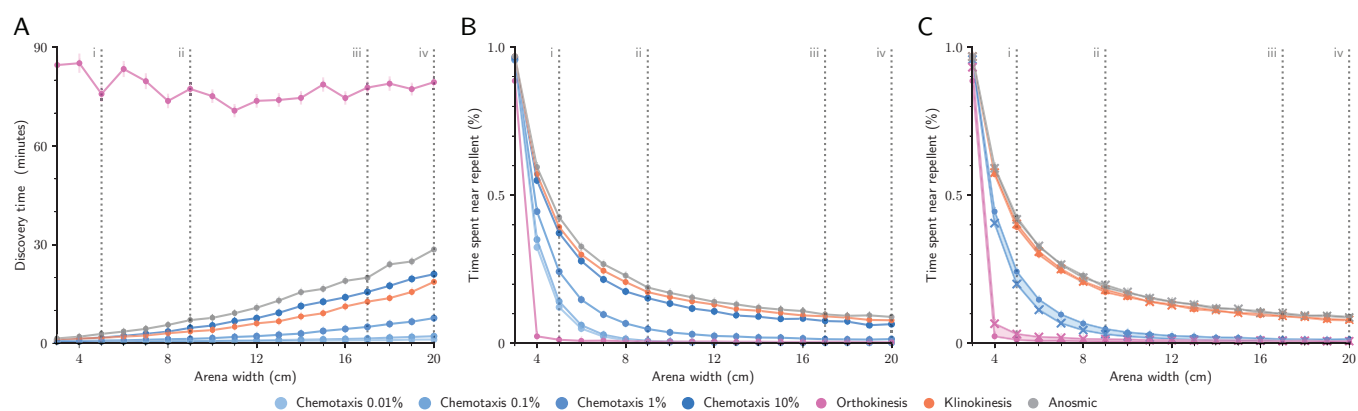

**Figure S4: Simulation results are not affected by chemotactic sensitivity, or by substituting the starved and fed empirical datasets in the repellent-avoidance task.** A: Time elapsed before simulated larvae discovered food in the foraging task (mean  $\pm$  standard error). Chemotaxis % values indicate the lowest concentration difference detectable by simulated larvae during each time step (2fps). B: Time spent in high-repellent areas during the repellent-avoidance task (mean  $\pm$  standard error). All chemotactic sensitivities performed worse than the chemokinesis model. C: Starved simulations (X markers) and fed simulations (dots) performed similarly well during the repellent-avoidance task (mean  $\pm$  standard error, shaded regions show difference between fed and starved simulations). In all panels, dashed grey lines correspond to ecologically relevant habitat sizes described in Table 2.
